# Supplementary material for: Breakfast Choice Is Associated with Nutrient, Food Group and Discretionary Intakes in Australian Adults at Both Breakfast and the Rest of the Day
Source: PubMed Central journal article supplement (PMC6356876; doi:10.3390/nu11010175), 2019-01-15
Supplement: nutrients-11-00175-s001.pdf [file nutrients-11-00175-s001.pdf]

**Supplementary Table 1** Top 10 sub-major food groups consumed at breakfast ranked by prevalence of consumption among breakfast consumers.

| Rank | Breakfast cereal consumers                                          |             |                           | Non-cereal breakfast consumers                                      |             |                           |
|------|---------------------------------------------------------------------|-------------|---------------------------|---------------------------------------------------------------------|-------------|---------------------------|
|      | Sub-major food group                                                | % consumers | Median grams per consumer | Sub-major food group                                                | % consumers | Median grams per consumer |
| 1    | Breakfast cereals, ready to eat                                     | 81.7%       | 47                        | Regular breads, and bread rolls (plain/unfilled/untopped varieties) | 51.6%       | 56                        |
| 2    | Dairy milk (cow, sheep and goat)                                    | 79.2%       | 142                       | Dairy milk (cow, sheep and goat)                                    | 36.4%       | 31                        |
| 3    | Sugar, honey and syrups                                             | 35.8%       | 8                         | Coffee and coffee substitutes                                       | 30.9%       | 220                       |
| 4    | Tea                                                                 | 25.6%       | 200                       | Sugar, honey and syrups                                             | 28.8%       | 7                         |
| 5    | Coffee and coffee substitutes                                       | 22.5%       | 200                       | Tea                                                                 | 22.7%       | 220                       |
| 6    | Breakfast cereals, hot porridge style                               | 18.9%       | 203                       | Margarine and table spreads                                         | 21.1%       | 5                         |
| 7    | Regular breads, and bread rolls (plain/unfilled/untopped varieties) | 16.1%       | 36                        | Butters                                                             | 12.4%       | 7                         |
| 8    | Yoghurt                                                             | 11.6%       | 62                        | Eggs                                                                | 12.1%       | 78                        |
| 9    | Fruit and vegetable juices, and drinks                              | 11.4%       | 263                       | Yeast, and yeast vegetable or meat extracts                         | 11.2%       | 6                         |
| 10   | Tropical and subtropical fruit                                      | 9.7%        | 98                        | Fruit and vegetable juices, and drinks                              | 10.0%       | 302                       |

**Supplementary Table 2** Top sub-major food groups at breakfast by the contribution to total daily discretionary energy among breakfast consumers.

| Rank | Breakfast cereal consumers                        |                |             |                    | Non-cereal breakfast consumers                   |                |             |                    |
|------|---------------------------------------------------|----------------|-------------|--------------------|--------------------------------------------------|----------------|-------------|--------------------|
|      | Sub-major food group                              | % contribution | % consumers | kJ among consumers | Food group                                       | % contribution | % consumers | kJ among consumers |
| 1    | Sugar, honey and syrups                           | 4.7%           | 35.8%       | 204                | Sugar, honey and syrups                          | 3.0%           | 28.8%       | 161                |
| 2    | Breakfast cereals, ready to eat                   | 0.8%           | 2.6%        | 825                | Butters                                          | 2.0%           | 12.4%       | 323                |
| 3    | Jam and lemon spreads, chocolate spreads, sauces  | 0.6%           | 5.8%        | 203                | Processed meat                                   | 1.6%           | 8.2%        | 545                |
| 4    | Fruit and vegetable juices, and drinks            | 0.6%           | 2.5%        | 489                | Jam and lemon spreads, chocolate spreads, sauces | 1.6%           | 9.4%        | 243                |
| 5    | Butters                                           | 0.6%           | 5.1%        | 247                | Pastries                                         | 0.8%           | 2.2%        | 1436               |
| 6    | Other beverage flavourings and prepared beverages | 0.3%           | 1.4%        | 144                | Cakes, muffins, scones, cake-type desserts       | 0.7%           | 1.8%        | 2035               |
| 7    | Formula dietary foods                             | 0.2%           | 0.6%        | 597                | Sweet biscuits                                   | 0.7%           | 1.8%        | 635                |
| 8    | Processed meat                                    | 0.2%           | 0.9%        | 610                | Yeast, and yeast vegetable or meat extracts      | 0.6%           | 11.2%       | 47                 |
| 9    | Cakes, muffins, scones, cake-type desserts        | 0.1%           | 0.3%        | 1618               | Fruit and                                        | 0.6%           | 3.1%        | 547                |

|    |              |      |      |     |                                                                            |      |      |     |
|----|--------------|------|------|-----|----------------------------------------------------------------------------|------|------|-----|
| 10 | Dairy blends | 0.1% | 1.0% | 219 | vegetable<br>juices,<br>and<br>drinks<br>Muesli or<br>cereal<br>style bars | 0.4% | 1.3% | 733 |
|----|--------------|------|------|-----|----------------------------------------------------------------------------|------|------|-----|

**Supplementary Table 3** Contribution from the breakfast cereal to total daily nutrient intakes.

| <b>Nutrient</b>      | <b>Contribution to daily intakes (%)</b> |
|----------------------|------------------------------------------|
| Energy               | 10.6%                                    |
| Protein              | 8.0%                                     |
| Total fat            | 5.6%                                     |
| <i>Saturated fat</i> | 3.5%                                     |
| Total sugars         | 7.8%                                     |
| <i>Added sugars</i>  | 12.5%                                    |
| <i>Free sugars</i>   | 11.7%                                    |
| Carbohydrate         | 15.3%                                    |
| Fibre                | 21.9%                                    |
| Niacin               | 13.8%                                    |
| Iron                 | 32.6%                                    |
| Thiamin              | 35.6%                                    |
| Riboflavin           | 23.2%                                    |
| Folate               | 26.0%                                    |
| Calcium              | 9.7%                                     |
| Sodium               | 5.4%                                     |
| Magnesium            | 16.5%                                    |
| Potassium            | 7.9%                                     |
